# Supplementary material for: Therapeutic use of cannabis and cannabinoids: an evidence mapping and appraisal of systematic reviews
Source: BMC Complement Med Ther. 2020 Jan 15;20:12. doi: 10.1186/s12906-019-2803-2 (PMC7076827; doi:10.1186/s12906-019-2803-2)
Supplement: Supplementary file 3 — Additional file 3: Characteristics of individual studies included in systematic reviews. [file 12906_2019_2803_MOESM3_ESM.xlsx]

## Sheet: Sheet3
AUTHOR/YEAR	No. INDIVIDUALS	POPULATION	COUNTRY	FUNDING	FOLLOW-UP	STUDY DESIGN	PARALLEL/CROSSOVER	INTERVENTION 1	INTERVENTION 2	INTERVENTION 3	CONTROL	PICO 1	PICO 2	PICO 3	PICO 4	PICO 5	PICO 6	PICO 7	PICO 8	PICO 9	PICO 10	PICO 11	PICO 12	PICO 13	PICO 14	PICO 15	PICO 16	PICO 17	PICO 18	PICO 19	PICO 20	PICO 21	PICO 22	PICO 23	PICO 24	PICO 25	PICO 26	PICO 27	PICO 28	PICO 29	PICO 30	PICO 31	PICO 32	PICO 33	PICO 34	PICO 35	PICO 36	PICO 37	PICO 38
ABRAMS 2003	67	PATIENTS WITH HIV WASTING SYNDROME	USA	National Institutes of Health grants	21D	RCT	PARALLEL	SMOKED CANNABIS 3.95% THC 3V/D	DRONABINOL 7.5MG/D		PLACEBO
ABRAMS 2007	55	PATIENTS WITH NEUROPATHIC PAIN OF HIV-ASSOCIATED	USA	University of California Center for Medicinal Cannabis Research	12D	RCT	PARALLEL	SMOKED THC (3.56%)			PLACEBO	1				1				1			1		1
ABRAMS 2011	21	PATIENTS WITH CRHONIC PAIN	USA	National Institutes of Health	5D	UCT	NA	VAPORIZED CANNABIS 3.56%						1
AHMEDZAI 1983	34	PATIENTS WITH GYNAECOLOGICAL CANCER CHEMOTHERAPY-INDUCED EMESIS	UK	NOT STATED	4D	RCT	CROSSOVER	NABILONE 4MG/D			PROCLORPERAZINE 30MG/DIA
AMES 1985	12	PATIENTS WITH EPILEPSY	UNCLEAR	UNCLEAR	4W	NRCT	PARALLEL	CANNABIDIOL 300MG/D			PLACEBO
ARAGONA 2009	17	MULTIPLE SCLEROSIS	ITALY	GW Pharma Ltd.	3W	RCT	CROSSOVER	ORO MUCOSAL SPRAY THC/CBD (2.7/2.5)			PLACEBO
ATTAL 2004	8	PATIENTS WITH CHRONIC NEUROPATHIC PAIN	FRANCE	NOT STATED	4M	UCT	NA	DRONABINOL MAX 25MG/D			NA
BEAL 1995	139	PATIENTS WITH HIV WASTING SYNDROME	USA	UNIMED Pharmaceuticals and Roxane Laboratories	42D	RCT	PARALLEL	DRONABINOL 5MG/D			PLACEBO
BEAULIEU 2006	41	POSTOPERATIVE PAIN	CANADA	Canadian Institutes of Health Research	24H	RCT	PARALLEL	NABILONE 1 MGX 3 DOSES	NABILONE 2MG X 3 DOSES	KETOPROFEN 50MG X 3 DOSES	PLACEBO																										1
BERGAMASCHI 2011	24	GENERALIZED SOCIAL ANXIETY DISORDER	BRASIL	FAPESP	90 MIN	RCT	PARALLEL	CANNABIDIOL 600MG			PLACEBO
BERMAN 2004	48	PATIENTS WITH NEUROPATHIC PAIN FROM BRACHIAL PLEXUS AVULSION	UK	GW Pharmaceuticals	2W	RCT	CROSSOVER	ORO MUCOSAL SPRAY THC/CBD (2.7/2.5) 48S/D	OROMUCOSAL SPRAY THC 2.7 48S/D		PLACEBO	1					1			1	1	1
BERMAN 2007	117	PATIENTS WITH neuropathic pain due to spinal cord injury	UK, ROMANIA	UNCLEAR	3W	RCT	PARALLEL	ORO MUCOSAL SPRAY THC/CBD (2.7/2.5)			PLACEBO	1
BLAKE 2006	48	RHEUMATOID ARTHRITIS	UK	GW Pharmaceuticals	5W	RCT	PARALLEL	ORO MUCOSAL SPRAY THC/CBD (2.7/2.5)			PLACEBO	1					1			1
BRADY 2004	21	MULTIPLE SCLEROSIS BLADDER DYSFUNCTION		Multiple Sclerosis Trust, the Medicinal Cannabis Research Foundation and USA NIH	8W	NRCT	CROSSOVER	ORO MUCOSAL SPRAY THC/CBD (2.5/2.5) 48S/D	OROMUCOSAL SPRAY THC 2.5 48S/D
BRISBOIS 2011	46	PATIENTS WITH CANCER WITH POOR APPETITE AND CHEMOSENSORY ALTERATIONS	USA	Canadian Institutes of Health Research	18D	RCT	PARALLEL	DRONABINOL 2.5-5MG/D			PLACEBO																																		1
BRODER 1982	44	PATIENTS WITH CANCER CHEMOTHERAPY-INDUCED EMESIS	USA	UNCLEAR	1CX CYCLE	RCT	CROSSOVER	ORAL THC 10MG/M2 C/4-6H			HYDROXIZINE 50MG/4-6H
BUGGY 2003	40	POSTOPERATIVE PAIN	IRELAND	NOT STATED	6H	RCT	PARALLEL	ORAL THC 5mg			PLACEBO																										1
CARROLL 2004	19	DYSKINESIA IN PARKINSON DISEASE	UK	NOT STATED	4S	RCT	CROSSOVER	ORAL CANNABIS EXTRACT THC/CBD (2.5/1.25) 0.034–0.25 mg THC/kg daily			PLACEBO
CENTZONE 2009	20	MS WITH CRHONIC NEUROPATIC PAIN	ITALY	Fondazione Italiana Sclerosi Multipla	6S	UCT	NA	ORO MUCOSAL SPRAY THC/CBD (2.7/2.5) 40S/D
CHAN 1987	40	CHILDREN WITH CANCER CHEMOTHERAPY-INDUCED EMESIS				RCT	CROSSOVER	NABILONE 9MG/D			PROCLORPERAZINE
CHANG 1979	15	Osteogenic sarcoma methotrexate chemotherapy induced emesis	USA	NOT STATED	5-6M	RCT	CROSSOVER	ORAL THC 10MG/M2 5 DOSES			PLACEBO
CHANG 1981	8	Soft tissue sarcomas with adriamycin and aytoxan chemotherapy induced emesis	USA	NOT STATED	NOT STATED	RCT	CROSSOVER	ORAL THC 10MG/M2 5 DOSES			PLACEBO
COLLIN 2007	189	MULTIPLE SCLEROSIS SPASTICITY	UK	GW Pharma Ltd.	6S	RCT	PARALLEL	ORO MUCOSAL SPRAY THC/CBD (2.7/2.5) 48S/D			PLACEBO
COLLIN 2010	337	MULTIPLE SCLEROSIS SPASTICITY	UK, Czech Republic	GW Pharma Ltd.	15S	RCT	PARALLEL	ORO MUCOSAL SPRAY THC/CBD (2.7/2.5) 24S/D			PLACEBO
COLLS 1980	105	SOLID TUMOURS CHEMOTHERAPY-INDUCED EMESIS		NOT SATATED	NOT STATED	RCT	CROSSOVER	DRONABINOL 12MG/M2X2	METOCLOPRAMIDE 4.5MG/M2X1		THIETHYLPERAZINE 6.6MG/M2X3
CONSROE 1991	15	Neuroleptic-free patients with Huntington's Disease	USA	U.S. Food and Drug Administration	6S	RCT	CROSSOVER	ORAL CBD 10MG/KG/D			PLACEBO
COOPER 2013	30	HEALTHY VOLUNTEERS WITH ACUTE INDUCED PAIN	USA	US National Institute on Drug Abuse	2-4W	RCT	CROSSOVER	DRONABINOL 10-20 MG	SMOKED CANNABIS 1.98 Y 3.56%		PLACEBO																												1	1	1
COREY-BLOOM 2012	37	MULTIPLE SCLEROSIS SPASTICITY	USA	Center for Medicinal Cannabis research	3D	RCT	CROSSOVER	SMOKED THC 4% 1 CIGARRETE			PLACEBO							1
CRAWFORD 1986	32	Antiemetic support in patients being treated with cisplatin	UK	NOT STATED	24H	RCT	CROSSOVER	NABILONE 1MGX5			METOCLOPRAMIDE IV 1MG/KGX5
CUNHA 1980	15	EPILEPTIC PATIENTS	BRASIL	U.S. National Institute of mental health	8-18S	RCT	PARALLEL	ORAL CBD 3-6MG/KG/D			PLACEBO
CURTIS 2009	44	CLINICAL DIAGNOSIS OF HUNTINGTON DISEASE	UK	Cambridge Laboratorie, Valeant pharmaceutica	5S	RCT	CROSSOVER	NABILONE 1 - 2MG			PLACEBO
DALZELL 1986	18	CHILDREN WITH CANCER CHEMOTHERAPY-INDUCED EMESIS	UK	NOT STATED	16M	RCT	CROSSOVER	NABILONE 1-3MG			DOMPERIDONE 15- 45 MG
NCT01606176	70	Chronic Refractory Pain Due to Multiple Sclerosis	UK	GW Pharmaceuticals Ltd.	3S	RCT	PARALLEL	ORO MUCOSAL SPRAY THC/CBD (2.5/2.5) 48S/D			PLACEBO	1									1
DEVINE 1987	809	PATIENTS WITH CANCER CHEMOTHERAPY-INDUCED EMESIS				OBSERVATIONAL	NA	DRONABINOL
DURAN 2010	16	PATIENTS WITH CANCER CHEMOTHERAPY-INDUCED EMESIS	SPAIN	Agènciad’Avaluació de Tecnologia i Recerca Mèdiques (AATRM	4D	RCT	PARALLEL	ORO MUCOSAL SPRAY THC/CBD (2.7/2.5) 48S/D			PLACEBO
EINHORN 1981	100	PATIENTS WITH CANCER CHEMOTHERAPY-INDUCED EMESIS	USA	NOT STATED	5D	RCT	CROSSOVER	NABILONE 8MG/D			PROCHLORPERAZINE 40MG/D
EKERT 1979	18	CHILDREN WITH CANCER CHEMOTHERAPY-INDUCED EMESIS		NOT STATED		RCT		ORAL THC 10MG/M2 5 DOSES	METOCLOPRAMIDE 5-10MG 4DOSES		PLACEBO
EKERT 1979	18	CHILDREN WITH CANCER CHEMOTHERAPY-INDUCED EMESIS		NOT STATED		RCT		ORAL THC 10MG/M2 5 DOSES	PROCHLORPERAZINE 5-10MG 4 DOSES		PLACEBO
ELLIS 2009	34	Refractory neuropathic pain due to HIV distal sensory polyneuropathy	USA	Center for Medicinal Cannabis Research	5D	RCT	CROSSOVER	SMOKED THC 1-8%			PLACEBO	1				1				1	1		1		1
FOX 2004	14	MULTIPLE SCLEROSIS TREMOR	UK	NOT STATED	2S	RCT	CROSSOVER	ORAL CANNABIS EXTRACT THC/CBD 2:1			PLACEBO
FOX 2002	15	Patients with primary torsion dystonia	UK	Dystonia Society	180MIN	RCT	CROSSOVER	NABILONE 0.03 mg/kg			PLACEBO
FRANK 2008	96	CHRONIC NEUROPHATIC PAIN	UK	Cambridge Laboratories	6S	RCT	PARALLEL	NABILONE 2MG/D			DIHYDROCODEINE 240 MG/D	1								1									1
FREEMAN 2006	522	MULTIPLE SCLEROSIS INCONTINENCE	UK	Multiple Sclerosis Society, Medical Research Council	13S	RCT	PARALLEL	ORAL CANNABIS EXTRACT THC/CBD (2.5/1.25)	ORAL THC 2.5MG		PLACEBO
FRYTAK 1979	117	PATIENTS WITH GASTROINTESTINAL CANCER CHEMOTHERAPY-INDUCED EMESIS	USA	NOT STATED	4D	RCT	PARALLEL	DRONABINOL 15MG X 4D 3V/D	PROCHLORPERAZINE 10MG		PLACEBO
GEORGE 1983	20	PATIENTS WITH GYNAECOLOGICAL CANCER CHEMOTHERAPY-INDUCED EMESIS	FRANCE	NOT STATED	UNCLEAR	RCT	CROSSOVER	NABILONE 1MG X7			CHLORPROMAZINE 12.5 MG IM X1
GRALLA 1984	31	PATIENTS WITH CANCER CHEMOTHERAPY-INDUCED EMESIS				RCT	PARALLEL	DRONABINOL			METOCLOPRAMIDE
GREENBERG 1994	20	MULTIPLE SCLEROSIS SPASTICITY	USA	National Multiple Sclerosis Society, Neuropsychopharmacology Research Fund	2D	RCT	CROSSOVER	SMOKED THC 1.54%			PLACEBO
GUILLAUD 1983	25	POSTOPERATIVE PAIN				RCT		LEVONANTRADOL 1-2 MG	PETHIDINE 1MG/KG		PLACEBO																											1
NCT00710424	297	PATIENTS WITH Diabetic Neuropathy	Czech Republic	GW Pharmaceuticals Ltd.	14W	RCT	PARALLEL	ORO MUCOSAL SPRAY THC/CBD (2.7/2.5) 24S/D			PLACEBO	1									1
HAGENBACH 2007	22	PATIENTS WITH TRAUMATIC SPNAL CORD INJURY	Switzerland	NOT STATED	6S	RCT	PARALLEL	DRONABINOL 10MG	THC-hemisuccinate 5-10 mg		PLACEBO																																	1
HANEY 2005	30	PATIENTS WITH HIV	USA	US National Institute on Drug Abuse and the National Center for Complementary and Alternative Medicine	7H	RCT	CROSSOVER	DRONABINOL 10,20,30MG	SMOKED THC 1.8, 2.8, 3.9%		PLACEBO
HANEY 2007	10	PATIENTS WITH HIV	USA	US National Institute on Drug Abuse and the National Center for Complementary and Alternative Medicine	24H	RCT	CROSSOVER	DRONABINOL 5-10 4V/D	SMOKED CANNABIS 2 Y 3.9%		PLACEBO
HEIM 1984	57	PATIENTS WITH CANCER CHEMOTHERAPY-INDUCED EMESIS	GERMANY	NOT STATED	24H	RCT	CROSSOVER	LEVONANTRADOL (IM) 0,5MG X3			METOCLOPRAMIDE 10MG X3
HERMAN 1979	152	PATIENTS WITH CANCER CHEMOTHERAPY-INDUCED EMESIS	USA	ELI LILLY AND COMPANY, NATIONAL CANCER INSTITUTE	24H	RCT	CROSSOVER	NABILONE 8MG/D			PROCHLORPERAZINE 40MG/D
HOLDCROFT 1997	1	PATIENT WITH MEDITERRANEAN FEVER	UK	NOT STATED	6W	RCT	CROSSOVER	ORAL CANNABIS EXTRACT THC CBD MAX 10MG THC			PLACEBO				1
HOLDCROFT 2006	65	PATIENTS WITH POSTOPERATIVE PAIN		Imperial College and Chelsea and Westminster Hospital	6H	UCT	NA	CANNADOR 5,10,15 mg
HUGGINS 2012	74	PATIENTS WITH PAIN RELATED TO KNEE OSTEORTRITIS	UK/SWEDEN/CANADA	PFIZER	2W	RCT	CROSSOVER	PF-04457845 4MG QD	NAPROXEN 500MG BID		PLACEBO							1
HUTCHEON 1983	108	PATIENTS WITH CANCER CHEMOTHERAPY-INDUCED EMESIS	UK	CANCER RESEARCH CAMPAIGN	24H	RCT	PARALLEL	LEVONANTRADOL (IM) 0.5, 0.75, 1 MGX 4DOSES			CHLORPROMAZINE
JAIN 1981	56	PATIENTS WITH FRACTURE, OR TRAUME PAIN REQUIRING A PARENTERAL ANALGESIC	USA	PFIZER	24H	RCT	PARALLEL	LEVONANTRADOL 1,5, 2, 2,5, 3MG			PLACEBO																											1
JATOI 2002	469	PATIENTS WITH CANCER-ASSOCIATED ANOREXIA	USA	United States Public Health Service	2M	RCT	PARALLEL	DRONABINOL 5MG/D + PLACEBO	MEGESTROL 800MG/D + PLACEBO		DRONABINOL 5/MEGESTROL 800/																																		1	1
JOCHINSEN 1978	37	PATIENTS WITH CHRONIC PAIN DUE TO MALIGNANCES	USA	National Institutes of Health; Abbott Laboratories		RCT	CROSSOVER	BENZOPYRANOPERIDINE ORAL 2-4 MG	CODEINE 60-120 MG		PLACEBO	1	1																																			1	1
JOHANSSON 1982	27	PATIENTS WITH CANCER CHEMOTHERAPY-INDUCED EMESIS despite the use of standard antiemetic drugs,	FINLAND	NOT STATED	2 CYCLES	RCT	CROSSOVER	NABILONE 2MG X 4DOSES			PROCHLORPERAZINE 10MG X 4 D	1
JOHNSON 2010 (2005)	177	PATIENTS WITH MODERATE TO SEVERE CANCER-RELATED PAIN	BELGIUM; ROMANIA; UK	GW Pharma Ltd	2W	RCT	PARALLEL	ORO MUCOSAL SPRAY THC/CBD (2.7/2.5) 48S/D	OROMUCOSAL SPRAY THC 2.7MG 48S/D		PLACEBO	1																																			1
JONES 1982	24	PATIENTS WITH CANCER CHEMOTHERAPY-INDUCED EMESIS	USA	Eli Lilly Company	UNCLEAR	RCT	CROSSOVER	NABILONE 2MG x 4DOSES			PLACEBO
KALLIOMÄKI 2013	151	PATIENTS UNDERGOING THRID MOLAR SURGICAL REMOVAL	USA	AstraZeneca R&D Södertälje	8H	RCT	PARALLEL	ORAL SOLUTION OF AZD 1940 800 UG	NAPROXEN 500mg		PLACEBO																										1
KARST 2003	21	PATIENTS WITH CRHONIC NEUROPATHIC PAIN	USA	ATLANTIC TECHNOLOGY VENTURES, INDEVUS PHARMACEUTICALS INC	1W	RCT	CROSSOVER	ORAL CT3 40MG/D			PLACEBO	1								1	1					1
KAVIA 2010	135	PATIENTS WITH MS-RELATED OVERACTIVE BLADDER	BELGIUM; ROMANIA; UK	GW Pharma Ltd	8W	RCT	PARALLEL	ORO MUCOSAL SPRAY THC/CBD (2.7/2.5) 48S/D			PLACEBO
KILLESTEIN 2002	16	PATIENTS WITH PROGRESSIVE MS	NETHERLANDS	Dutch Ministry of Health, Welfare and Sport	4W	RCT	CROSSOVER	ORAL CANNABIS EXTRACT THC/CBD (20-30%)	DRONABINOL 5-10MG/D		PLACEBO	1
KLEINMAN 1983	16	PATIENTS WITH CANCER CHEMOTHERAPY-INDUCED EMESIS	USA	NOT STATED	UNCLEAR	RCT	CROSSOVER	PROCHLORPERAZINE 10MG+ DRONABINOL 15MG x 2 DOSES			PROCHLORPERAZINE + PLACEBO
KLUIN-NELEMAN 1979	11	PATIENTS WITH CANCER CHEMOTHERAPY-INDUCED EMESIS LYMPHOMA	NETHERLANDS	UNCLEAR	UNCLEAR	RCT	CROSSOVER	DRONABINOL 10MGX M2 BID			PLACEBO
KNOLLER 2002	67	PATIENTS WITH SEVERE HEAD INJURY	ISRAEL	PHARMOS	UNCLEAR	RCT	PARALLEL	DEXANABINOL 48/150mg			PLACEBO
LANE 1991	62	PATIENTS WITH CANCER CHEMOTHERAPY-INDUCED EMESIS	USA	Roxane Laboratories and UNIMED.	6D	RCT	PARALLEL	Dronabinol 40MG DAY + PLACEBO	Dronabinol 40 mg + prochlorperazine 40 mg /D		Prochlorperazine 40MG/DAY + PLACEBO
LANGFORD 2013	339	MS WITH CRHONIC NEUROPATIC PAIN	UK, Czech Republic, Canada, Spain	GW Pharma Ltd	14W	RCT	PARALLEL	ORO MUCOSAL SPRAY THC/CBD (2.7/2.5) 12S/D			PLACEBO	1						1		1	1	1
LEOCANI 2015	43	PROGRESSIVE MULTIPLE SCLEROSIS	ITALY	Almirall S.A	2W	RCT	CROSSOVER	ORO MUCOSAL SPRAY THC/CBD (2.7/2.5)			PLACEBO
LEVITT 1982	58	PATIENTS WITH CANCER CHEMOTHERAPY-INDUCED EMESIS	CANADA	NOT STATED	UNCLEAR	RCT	CROSSOVER	NABILONE 4MG/D			PLACEBO
LEWEKE 2012	42	PATIENTS WITH SCHIZOPHRENIA	GERMANY	Stanley Medical Research Institute (FML) and the National Institute on Drug Abuse	28D	RCT	PARALLEL	CANNABIDIOL MAX 800MG/D			AMISULPRIDE 800MG/D
LONG 1982	42	PATIENTS WITH CANCER CHEMOTHERAPY-INDUCED EMESIS	USA			RCT	CROSSOVER	LEVONANTRADOL 4MG/D			PROCHLORPERAZINE 40MG/D
LOTAN 2014	22	PATIENTS WITH PARKINSON DISEASE	ISRAEL	NOT STATED	2M	OBSERVATIONAL	NA	SMOKED CANNABIS			NA
LYNCH 2014	18	PATIENTS WITH CHEMOTHERAPY INDUCED NEUROPATHIC PAIN	CANADA	NO FUNDING	4W	RCT	CROSSOVER	ORO MUCOSAL SPRAY THC/CBD (2.7/2.5) 12S/D			PLACEBO	1						1			1
MAAS 2006	861	PATIENTS WITH SEVERE TRAUMATIC BRAIN INJURY	15 countries	American and European Brain Injury consortia	6M	RCT	PARALLEL	DEXANABINOL 150MG IV			PLACEBO
MAURER 1990	1	PATIENT WITH SPINAL CORD INJURY RELATED-pain SPASTICITY	Switzerland	NOT STATED	5M	RCT	CROSSOVER	ORAL SUGAR LUMPS THC 5MG	CODEINE 50 MG		PLACEBO				1												1
McCABE 1988	36	PATIENTS WITH CANCER CHEMOTHERAPY-INDUCED EMESIS	USA	NOT STATED	1D	RCT	CROSSOVER	DRONABINOL 15 MG/M2 X 7DOSES			PROCHLORPERAZINE 1MG X 7 DOSES
MECHOULAM 1978	9	PATIENTS WITH UNCONTROLLED TEMPORAL LOBE EPILEPSY		NOT STATED	3M	RCT	PARALLEL	CANNABIDIOL 200 mg			PLACEBO
MEIRI 2007	64	PATIENTS WITH CANCER CHEMOTHERAPY-INDUCED EMESIS	USA	Solvay Pharmaceuticals, Inc	5D	RCT	PARALLEL	DRONABINOL 10 mg day x 5 day	DRONABINOL 10MG/DAY+ONDANSETRON 16MG/DAY	ONDANSETRON 16MG/Día x 5 days	PLACEBO
MELHEM BERTRANDT, Harden-Harrison 2014	62	PATIENTS WITH CANCER CHEMOTHERAPY-INDUCED EMESIS	USA	M.D. Anderson Cancer Center, National Cancer Institute (NCI), Solvay Pharmaceuticals	5D	RCT	PARALLEL	DRONABINOL 15MG/DX 5 DIAS + PALONOSETRON HYDROCHLORIDE 0.25 mg+ DEXAMETHASONE	PALONOSETRON HYDROCHLORIDE 0.25MG+ DEXAMETHASONE		PLACEBO
MÜLLER-VAHL 2001	12	PATIENTS WITH TOURETTE SYNDROME	GERMANY	Tourette Syndrome Association, Bayside, New York	1H	RCT	CROSSOVER	ORAL CAPSULES THC 5- 10MG			PLACEBO
MULLER-VAHL 2003	24	PATIENTS WITH TOURETTE SYNDROME	GERMANY	Medical School of Hannover	6W	RCT	PARALLEL	ORAL CAPSULES THC 2.5-5 MG			PLACEBO
NAEF 2003	12	HEALTHY VOLUNTEERS WITH ACUTE INDUCED PAIN	SWITZERLAND	Swiss Society of Anaesthesia, Reanimation and the Novartis Foundation for Medico-Biological Research	480MIN	RCT	CROSSOVER	DRONABINOL 20MG	DRONABINOL 20MG + MORPHINE 30 mg	MORPHINE HYDROCHLORIDE 30 mg	PLACEBO
NAFTALI 2013	21	PATIENTS WITH CROHN’S DISEASE	ISRAEL	Meir Medical Center	8W	RCT	PARALLEL	SMOKED CANNABIS 115 MG THC			PLACEBO
NARANG 2008	30	PATIENTS WITH CRHONIC NON CANCER PAIN	USA	Solvay Pharmaceuticals, Inc.	8H	RCT	CROSSOVER	DRONABINOL 10MG	DRONABINOL 20MG		PLACEBO	1							1
NCT00710424	297	PATIENTS WITH DIABETIC NEUROPATHY	UK, Czech Republic, ROMANIA	GW Pharma Ltd	14W	RCT	PARALLEL	ORO MUCOSAL SPRAY THC/CBD (2.7/2.5) 24S/D			PLACEBO	1									1
NCT01606176	70	MULTIPLE SCLEROSIS RELATED PAIN	UK	GW Pharmaceuticals Ltd	3W	RCT	PARALLEL	ORO MUCOSAL SPRAY THC/CBD (2.5/2.5) 48S/D			PLACEBO	1									1
NCT01606202	116	PATIENTS WITH PAIN DUE TO SPINAL CORD INJURY	UK, ROMANIA	GW Pharmaceuticals Ltd.	51D	RCT	PARALLEL	ORO MUCOSAL SPRAY THC/CBD (2.7/2.5) 48S/D			PLACEBO										1
NEIDHART 1981	77	PATIENTS WITH CANCER CHEMOTHERAPY-INDUCED EMESIS	USA	National Cancer Institute, Department of Health, Education and Welfare	UNCLEAR	RCT	CROSSOVER	ORAL CAPSULES THC 10MG			HALOPERIDOL 2MG
NELSON 1994	19	PATIENTS WITH ANOREXIA DUE TO ADVANCED CANCER	USA	UNIMED INC, ROXANE LABORATORIES	4W	UCT	NA	ORAL CAPSULES THC 7.5 MG/D
NIEDERLE 1986	20	PATIENTS WITH CANCER CHEMOTHERAPY-INDUCED EMESIS	GERMANY	NOT STATED	5D	RCT	CROSSOVER	NABILONE 2MG X 10 DOSES			ALIZAPRIDE 150MG X15 DOSES
NIIRANEN 1985	24	PATIENTS WITH CANCER CHEMOTHERAPY-INDUCED EMESIS		NOT STATED	UNCLEAR	RCT	CROSSOVER	NABILONE 2MG			PROCHLOPERAZINE 15MG
NOTCUTT 2004	34	PATIENTS WITH CHRONIC PAIN	UK	GW Pharmaceuticals, MS Society	1W	RCT	CROSSOVER	ORO MUCOSAL SPRAY THC/CBD (2.5/2.5)	OROMUCOSAL SPRAY THC 2.5	OROMUCOSAL SPRAY CBD	PLACEBO	1					1
NOTCUTT 2012	36	MULTIPLE SCLEROSIS SPASTICITY	UK	GW Pharmaceuticals	4W	RCT	PARALLEL	OROMUCOSAL SPRAY THC/CBD			PLACEBO
NOVOTNA 2011	241	MULTIPLE SCLEROSIS SPASTICITY	UK	GW Pharmaceuticals Ltd	12W	RCT	PARALLEL	ORO MUCOSAL SPRAY THC/CBD (2.7/2.5) 12S/D			PLACEBO
NOYES 1975A	10	PATIENTS WITH ADVANCED CANCER	USA	General Clinical Research Centers Program Division of Research Resources, National Institutes of Health,	1D	RCT	CROSSOVER	ORAL CAPSULES THC 5MG-10MG	THC CAPSULES 15-20MG		PLACEBO	1
NOYES 1975B	36	PATIENTS WITH ADVANCED CANCER	USA	General Clinical Research Centers Program Division of Research Resources. National Institutes of Health.	1D	RCT	CROSSOVER	ORAL CAPSULES THC 10, 20 MG	CODEINE 60-120 MG		PLACEBO	1	1
NURMIKKO 2007	125	PERIPHERAL NEUROPATHIC PAIN AND ALLODYNIA	BELGIUM, UK	GW Pharmaceuticals Ltd	10D	RCT	PARALLEL	ORO MUCOSAL SPRAY THC/CBD (2.7/2.5) 48S/D			PLACEBO						1			1	1	1
ORR 1981	55	PATIENTS WITH CANCER CHEMOTHERAPY-INDUCED EMESIS	USA	NOT STATED	1CX CYCLE	RCT	CROSSOVER	ORAL THC 7MG/M2 X 4 DOSES	PROCLORPERAZINE 7MG/M2 X4 DOSES		PLACEBO
OSTENFELD 2011	123	PATIENTS UNDERGOING THIRD MOLAR TOOTH EXTRACTION	UK, ITALY, GERMANY	GlaxoSmithKline	1D	RCT	PARALLEL	GW842166 100MG + PLACEBO	GW842166 800 MG+ PLACEBO	IBUPROFEN 800MG+ IBUPROFEN 400MG	PLACEBO+ PLACEBO																										1
PETRO 1981	9	MULTIPLE SCLEROSIS-SPASTICITY	USA	NOT STATED	180MIN	RCT	CROSSOVER	ORAL CAPSULES THC 5MG	ORAL CAPSULES THC 10MG		PLACEBO
PICKERING 2011	11	PATIENTS WITH BREATHLESSNESS (HEALTHY AND COPD)	UK	Breathlessness Research Charitable Trust; Cromwell Hospital, London	4H	RCT	CROSSOVER	ORO MUCOSAL SPRAY THC/CBD (2.7/2.5) 4 SPRAY			PLACEBO
PINI 2012	30	PATIENTS WITH MEDICATION OVERUSE HEADACHE	ITALY	NO FUNDING	8W	RCT	CROSSOVER	NABILONE 0.5 MG/DAY			IBUPROFEN 400MG/D																																1
PINSGER 2006	30	PATIENTS WITH CHRONIC SPINAL PAIN	AUSTRIA	UNCLEAR	4W	RCT	CROSSOVER	NABILONE 0.25MG-1MG			PLACEBO	1
POMEROY 1986	38	PATIENTS WITH CANCER CHEMOTHERAPY-INDUCED EMESIS			1CX CYCLE	RCT	PARALLEL	NABILONE 1MG X 4 DOSES			DOMPERIDONE 20 MG X 4 DOSES
PORTENOY 2012	360	PATIENTS WITH OPIOID REFRACTORY CANCER PAIN	Belgium, Canada, Chile, Czech Republic, Finland, France, Germany, India, Italy, Mexico, Poland, Romania, South Africa, Spain, UK, USA	GW Pharmaceuticals and Otsuka	5W	RCT	PARALLEL	ORO MUCOSAL SPRAY THC/CBD (2.7/2.5) 4 SPRAY	ORO MUCOSAL SPRAY THC/CBD (2.7/2.5) 6-10S/D	ORO MUCOSAL SPRAY THC/CBD (2.7/2.5) 11-16S/D	PLACEBO	1								1																											1
POOYANIA 2010	12	PATIENTS WITH SPINAL CORD INJURY	CANADA	Valeant Company and Scholarship to Advance Research in Spasticity Program	4W	RCT	CROSSOVER	NABILONE 0.5-1MG/D			PLACEBO
PRASAD 2011	22	PATIENTS WITH OBSTRUCTIVE SLEEP APNEA SYNDROME	USA	NOT STATED	21D	RCT	PARALLEL	DRONABINOL 10MG/D			PLACEBO
RHYNE 2016	121	PATIENTS WITH MIGRAINE HEADACHE	USA	NOT STATED	NA	OBSERVATIONAL	NA	VAPORIZED, EDIBLE, TOPICAL, SMOKED			NA																															1
RINTALA	7	PATIENTS WITH SPINAL CORD INJURY	USA	Paralyzed Veterans of America Research Foundation	28D	RCT	CROSSOVER	DRONABINOL MAX 20MG/D			DIPHENHYDRAMINE MAX 75MG/D																					1
ROG 2005	66	MULTIPLE SCLEROSIS PAIN	UK	GW Pharmaceuticals	4W	RCT	PARALLEL	ORO MUCOSAL SPRAY THC/CBD (2.7/2.5) 48S/D			PLACEBO	1					1			1	1	1
ROHLEDER 2012A	42	PATIENTS WITH PARANOID SCHIZOPHRENIA	USA	NOT STATED	4W	RCT	CROSSOVER	CBD 600MG/D			AMISULPRIDE
ROHLEDER 2012B	29	FIRST-BREAK SCHIZOPHRENIC PATIENTS	USA	NOT STATED	14D	RCT	CROSSOVER	CBD 600MG/D			PLACEBO
SALLAN 1975	22	PATIENTS WITH CANCER CHEMOTHERAPY-INDUCED EMESIS	USA	CANCER CENTER SUPPORT	3CX CYCLE	RCT	CROSSOVER	ORAL CAPSULES THC 10MG/M2 X 3 DOSES			PLACEBO
SALLAN 1980	84	PATIENTS WITH CANCER CHEMOTHERAPY-INDUCED EMESIS	USA	NATIONAL INSTITUTE OF HEALTH	1CX CYCLE	RCT	CROSSOVER	ORAL CAPSULES THC 10MG/M2 X 3 DOSES			PROCHLORPERAZINE 7MG X5
SEELING 2006	50	PATIENTS WITH POSTOPERATIVE PAIN (prostatectomy)	GERMANY	Rudolf and Clothilde Eberhardt Foundation	48h	RCT	PARALLEL	DRONABINOL 5 MG X 8 DOSES			PLACEBO																										1
SELVARAJAH 2010	30	DIABETIC PERIPHERAL NEUROPATHY	UK	Diabetes U.K. grant	12W	RCT	PARALLEL	ORO MUCOSAL SPRAY THC/CBD (2.7/2.5) 4S/D			PLACEBO	1								1	1	1												1
SERPELL 2014	246	PERIPHERAL NEUROPATHIC PAIN AND ALLODYNIA	Belgium, Canada, Czech Republic, Romania, UK	GW Pharma Ltd	14W	RCT	PARALLEL	ORO MUCOSAL SPRAY THC/CBD (2.7/2.5) 24S/D			PLACEBO							1			1															1
SHEIDLER 1984	20	PATIENTS WITH CANCER CHEMOTHERAPY-INDUCED EMESIS	USA	Pfizer	1CX CYCLE	RCT	CROSSOVER	LEVONANTRADOL (IM) 1MG X 4DOSES			PROCHLORPERAZINE 10MG X 4 D
SIERADZAN 2001	7	PATIENTS WITH PARKINSON DISEASE	UK	Medical Research Council (UK)	280 MIN	RCT	CROSSOVER	NABILONE 0.03 mg/kg X2DOSES			PLACEBO
SKRABEK 2008	40	PATIENTS WITH FIBROMYALGIA	CANADA	Valeant Canada Limited and an HSC Medical Staff Council Fellowship Fund	4W	RCT	PARALLEL	NABILONE 0.5-1 MG			PLACEBO	1
STAQUET 1978a	30	PATIENTS WITH CANCER PAIN	BELGIUM	NOT STATED	6H	RCT	CROSSOVER	NITROGEN-CONTAINING BENZOPYRAN DERIVATIVE 4MG	CODEINE 50 MG		PLACEBO	1
STAQUET 1978b	15	PATIENTS WITH CANCER PAIN	BELGIUM	NOT STATED	6H	RCT	CROSSOVER	NITROGEN-CONTAINING BENZOPYRAN DERIVATIVE 4MG	SECOBARBITAL 50MG		PLACEBO	1
STEELE 1980	55	PATIENTS WITH CANCER CHEMOTHERAPY-INDUCED EMESIS	USA	UNCLEAR	1CX CYCLE	RCT	CROSSOVER	NABILONE 2MGBID			PROCHLORPERAZINE 10MG BID
STRASSER 2006	243	PATIENTS WITH CANCER-ASSOCIATED ANOREXIA	Switzerland	Institute for Clinical Research	6W	RCT	PARALLEL	ORAL CANNABIS EXTRACT THC/CBD (2.5/1) BID	ORAL CANNABIS EXTRACT THC 2.5MG BID		PLACEBO																																		1
STRUWE 1993	12	PATIENTS WITH HIV WASTING SYNDROME	USA	National Center for Research Resources, and by UNIMED, Somerville, NJ, and Roxane Laboratories	5W	RCT	CROSSOVER	DRONABINOL 10MG/D			PLACEBO
SVENDSEN 2004	24	MULTIPLE SCLEROSIS PAIN	DENMARK	Danish Multiple Sclerosis Society, Warwara Larsen Foundation, Solvay Pharmaceuticals	21D	RCT	CROSSOVER	DRONABINOL 2.5-10 MG			PLACEBO	1							1	1	1
TIMPONE 1997	37	PATIENTS WITH HIV WASTING SYNDROME	USA	NIAID	12W	RCT	PARALLEL	DRONABINOL 5MG/D	DRONABINOL 5MG/D+ MEGESTROL ACETATO 750MG/D	DRONABINOL 5MG/D+ MEGESTROL ACETATO 250MG/D	MEGESTROL 750MG/D
TOMIDA 2006	6	PATIENTS WITH GLAUCOMA	UK	GW Pharmaceuticals	4W	RCT	CROSSOVER	OROMUCOSAL SPRAY THC 5MG 4S	OROMUCOSAL SPRAY CBD 20MG	OROMUCOSAL SPRAY CBD 40MG	PLACEBO
TOTH 2012	26	PATIENTS WITH NEUROPATIC PAIN	CANADA	Valeant Canada	9W	RCT	PARALLEL	NABILONE 1-4MG/DAY			PLACEBO							1		1	1												1
TREMBLY 1990	12	PATIENTS INCOMPLETELY CONTROLLED EPILEPSY		UNCLEAR	6M	RCT	CROSSOVER	ORAL CANNABIDIOL 300MG/D			PLACEBO
TURCOTTE 2015	15	MULTIPLE SCLEROSIS NEUROPATHIC PAIN	CANADA	Valeant Canada	9W	RCT	PARALLEL	NABILONE 2MG/D+ GABAPENTINE			GABAPENTINE + PLACEBO	1						1
UNGERLEIDER 1982	214	PATIENTS WITH CANCER CHEMOTHERAPY-INDUCED EMESIS	USA	National Cancer Institute	1CX CYCLE	RCT	CROSSOVER	ORAL CAPSULES THC 7.5 A 12.5 MG/M2D			PROCHLORPERAZINE 40MG/D
UNGERLEIDER 1987	13	MULTIPLE SCLEROSIS SPASTICITY	USA	LOUIS AND HAROLD PRICE FOUNDATION, UNIMED CORP	5D	RCT	CROSSOVER	ORAL THC CAPSULES 2.5-15mg/D			PLACEBO
VACHOVÁ	121	MULTIPLE SCLEROSIS SPASTICITY	CHEZCH REPUBLIC	GW Pharma Ltd	48W	RCT	PARALLEL	ORO MUCOSAL SPRAY THC/CBD (2.7/2.5) 12S/D			PLACEBO
VAN AMERONGEN	24	MULTIPLE SCLEROSIS	NETHERLANDS	Echo Pharmaceuticals	4W	RCT	PARALLEL	NOVEL ORAL FORMULATION THC ECP0O2A 16MG/D			PLACEBO
VANEY 2004	57	MULTIPLE SCLEROSIS SPASTICITY	Switzerland	Swiss Ministry of Health	14D	RCT	PARALLEL	ORAL CANNABIS EXTRACT CAPSULES THC/CBD (2.5/0,9) MAX 30MG THC/DAY			PLACEBO
VINCIGUERRA 1988	56	PATIENTS WITH CANCER CHEMOTHERAPY-INDUCED EMESIS	USA	Don Monti Memorial Research Foundation	1CX CYCLE	UCT	NA	SMOKED CANNABIS 5MG THC/M2			NA
VOLICER 1997	15	PATIENTS WITH ALZHEIMER'S DISEASE	USA	Department of Veterans Aairs, Roxane Laboratories, Inc.; UNIMED Pharmaceuticals, Inc	6W	RCT	CROSSOVER	DRONABINOL 5MG/DAY			PLACEBO
WADA 1982	114	PATIENTS WITH CANCER CHEMOTHERAPY-INDUCED EMESIS	USA	NOT STATED	1CX CYCLE	RCT	CROSSOVER	NABILONE 4MG/D			PLACEBO
WADE 2003	24	NEUROGENIC SYMPTOMS IN MS/SPINAL CORD INJURY/BRACHIAL PLEXUS INJURY/LIMB AMPUTATION	UK	GW Pharmaceuticals	2W	RCT	CROSSOVER	ORO MUCOSAL SPRAY THC/CBD (2.5/2.5) 48S/D	ORO MUCOSAL SPRAY THC 2.5 MG	ORO MUCOSAL SPRAY CBD 2.5 MG	PLACEBO	1					1			1	1
WADE 2004	160	MULTIPLE SCLEROSIS	UK	GW Pharmaceuticals	6W	RCT	PARALLEL	ORO MUCOSAL SPRAY THC/CBD (2.7/2.5) 48S/D			PLACEBO	1					1			1	1
WADE 2006	137	MULTIPLE SCLEROSIS	UK	GW Pharmaceuticals	82W	UCT	NA	NABIXIMOLS SPRAY			NO CONTROL
WALLACE 2007	19	HEALTHY VOLUNTEERS WITH ACUTE INDUCED PAIN	USA	UNIVERSITY OF CALIFORNIA CENTER FOR MEDICINAL CANNABIS RESEARCH	1H	RCT	CROSSOVER	SMOKED THC 2%	SMOKED THC 4%	SMOKED THC 8%	PLACEBO																													1
WALLACE 2015	16	PATIENTS WITH DIABETIC NEUROPATHY	USA	UNIVERSITY OF CALIFORNIA CENTER FOR MEDICINAL CANNABIS RESEARCH	3H	RCT	CROSSOVER	VAPORIZED THC 1%	VAPORIZED THC 4%	VAPORIZED THC 7%	PLACEBO	1								1															1
WALTHER 2011	2	PATIENTS WITH ALZHEIMER'S DISEASE	Switzerland	NO FUNDING	2W	RCT	CROSSOVER	DRONABINOL 2.5MG			PLACEBO
WARE 2010	32	PATIENTS WITH FIBROMYALGIA	CANADA	Valeant (Canada) Inc	2W	RCT	CROSSOVER	NABILONE 0,5-1MG/D			AMITRIPTYLINE 10-20MG/D	1								1
WARE 2010b	21	PATIENTS WITH POST-TRAUMATIC OR POSTSURGICAL NEUROPATHIC PAIN	CANADA	Canadian Institutes of Health Research Louise and Alan Edwards Foundation	2W	RCT	CROSSOVER	SMOKED THC 2.5%	SMOKED THC 6%	SMOKED THC 9.4%	PLACEBO					1				1	1				1			1		1	1
WEBER 2010	22	PATIENTS WITH AMYOTROPHIC LATERAL SCLEROSIS	Switzerland	Amyotrophic Lateral Sclerosis Association (ALSA) clinical management research grant.	2W	RCT	CROSSOVER	DRONABINOL 10MG			PLACEBO									1
WILSEY 2008	38	PATIENTS WITH NEUROPATHIC PAIN	USA	National Center for Research Resources	6H	RCT	CROSSOVER	SMOKED THC 3.5%	SMOKED THC 7%		PLACEBO	1				1				1			1		1			1
WILSEY 2013	39	PATIENTS WITH NEUROPATHIC PAIN	USA	National Center for Research Resources	6H	RCT	CROSSOVER	VAPORIZED THC 3.53%	VAPORIZED CANNABIS 1.29%		PLACEBO	1						1		1			1	1				1
WISSEL 2006	13	PATIENTS WITH CHRONIC UPPER MOTOR NEURON SYNDROME		NOT SATED	4W	RCT	CROSSOVER	NABILONE 1 MG			PLACEBO	1								1
ZADIKOFF 2011	9	PATIENTS WITH CERVICAL DYSTONIA	CANADA	Dystonia Medical Research Foundation	3W	RCT	CROSSOVER	DRONABINOL 15MG/D			PLACEBO
ZAJICEK 2003	657	MULTIPLE SCLEROSIS SPASTICITY	UK	MEDICAL RESEARCH COUNCIL, MULTIPLE SCLEROSIS SOCIETY OF GREAT BRITAIN AND NORTHERN IRELAND	15W	RCT	PARALLEL	ORAL CANNABIS EXTRACT THC/CBD (2.5/1.25)	DRONABINOL 25MG/D		PLACEBO
ZAJICEK 2012	279	MULTIPLE SCLEROSIS SPASTICITY	UK	Society for Clinical Research, Weleda	10w	RCT	PARALLEL	ORAL CANNABIS EXTRACT THC/CBD (2.5/08a1.8)			PLACEBO							1
	12528
[truncated: 58 more columns]
