# Supplementary material for: Therapeutic use of cannabis and cannabinoids: an evidence mapping and appraisal of systematic reviews
Source: BMC Complement Med Ther. 2020 Jan 15;20:12. doi: 10.1186/s12906-019-2803-2 (PMC7076827; doi:10.1186/s12906-019-2803-2)
Supplement: Supplementary file 4 — Additional file 4: PICOs included on systematic reviews. [file 12906_2019_2803_MOESM4_ESM.xlsx]

## Sheet: PICOS FINAL
No. PICO	Scenario	Population	Intervention	Comparison	No. SR	Systematic Reviews ID	No. RCT	Parallel	Cross-over	No. NRCT	No. UCT	Observational	Total studies	No. Patients	AMSTAR score SR1	AMSTAR score SR2	AMSTAR score SR3	AMSTAR score SR4	AMSTAR score SR5	Mean follow-up	Conclusion 1	Conclusion 2	Conclusion 3	Conclusion 4	Conclusion 5
1	CHRONIC PAIN	CHRONIC PAIN	CANNABIS AND CANNABINOIDS	PLACEBO	2	MARTIN 2009, WITHING 2015	37	16	21	0	0	0		2809	7	8				1D-14W	PROBABLY HARMFUL	PROBABLY BENEFICIAL
2	CHRONIC PAIN	CHRONIC PAIN	CANNABINOIDS	CODEINE	1	CAMPELL 2001	2	0	2	0	0	0		73	6					1D	PROBABLY HARMFUL
3	CHRONIC PAIN	CHRONIC PAIN	VAPORIZED CANNABIS 3.56%	PLACEBO	1	KHAISER 2016	0	0	0	0	1	0	1	21	2					5D	PROBABLY BENEFICIAL
4	CHRONIC PAIN	CHRONIC NON CANCER PAIN	ORAL CANNABIS EXTRACT	PLACEBO	1	CAMPELL 2001	2	0	2	0	0	0	4	2	6					6W-5M	NO EFFECT
5	CHRONIC PAIN	CHRONIC NON CANCER PAIN	SMOKED CANNABIS	PLACEBO	1	LYNCH 2011	4	1	3	0	0	0	8	148	8					6H-2W	BENEFICIAL
6	CHRONIC PAIN	CHRONIC NON CANCER PAIN	OROMUCOSAL CANNABIS SPRAY	PLACEBO	1	LYNCH 2011	7	4	3	0	0	0	14	505	8					1W-6W	BENEFICIAL
7	CHRONIC PAIN	CHRONIC NON CANCER PAIN	CANNABIS AND CANNABINOIDS	PLACEBO	1	LYNCH 2015	9	5	4	0	0	0		1073	8					3D-14W	BENEFICIAL
8	CHRONIC PAIN	CHRONIC NON CANCER PAIN	DRONABINOL	PLACEBO	1	LYNCH 2011	2	0	2	0	0	0		54	8					8H-21D	BENEFICIAL
9	NEUROPATHIC PAIN	NEUROPATHIC PAIN GENERAL	CANNABIS AND CANNABINOIDS	PLACEBO	3	BOYCHUK 2015; LYNCH 2011; OMS 2016	21	10	11	0	0	0		1605	3	8	7			6H-14W	PROBABLY BENEFICIAL	BENEFICIAL	UNCLEAR
10	NEUROPATHIC PAIN	NEUROPATHIC PAIN GENERAL	CANNABINOIDS	PLACEBO	3	ISKEDIJAN 2006; FINNERUP 2015; PETZKE 2016	15	10	5	0	0	0		1610	5	9	10			1W-14W	PROBABLY BENEFICIAL	PROBABLY HARMFUL	PROBABLY BENEFICIAL
11	NEUROPATHIC PAIN	NEUROPATHIC PAIN GENERAL	OROMUCOSAL CANNABIS SPRAY	PLACEBO	1	BOYCHUK 2015	5	4	1	0	0	0	10	608	3					1-4W	PROBABLY BENEFICIAL
12	NEUROPATHIC PAIN	NEUROPATHIC PAIN GENERAL	CANNABIS	PLACEBO	1	DESHPANDE 2015	4	1	3	0	0	0		166	6					6H-12D	UNCLEAR
13	NEUROPATHIC PAIN	NEUROPATHIC PAIN GENERAL	VAPORIZED CANNABIS	PLACEBO	1	LYNCH 2015	1	0	1	0	0	0	2	39	8					6H	PROBABLY BENEFICIAL
14	NEUROPATHIC PAIN	NEUROPATHIC PAIN GENERAL	SMOKED CANNABIS	PLACEBO	2	ANDREAE 2015; BOYCHUCK 2015	4	1	3	0	0	0	8	148	11	3				6H-2W	PROBABLY BENEFICIAL	PROBABLY BENEFICIAL
15	NEUROPATHIC PAIN	NEUROPATHIC PAIN GENERAL	CT3	PLACEBO	2	BOYCHUCK 2015; ISKEDJIAN 2006	1	0	1	0	0	0		21	5	3				1W	PROBABLY BENEFICIAL	PROBABLY BENEFICIAL
16	NEUROPATHIC PAIN	NEUROPATHIC PAIN GENERAL	ORAL CANNABIS EXTRACT	CODEINE	1	CAMPELL 2001	1	0	1	0	0	0	2	1	6					5M	PROBABLY BENEFICIAL
17	NEUROPATHIC PAIN	NEUROPATHIC PAIN GENERAL	LOWER DOSES CANNABIS	HIGHER DOSES CANNABIS	2	DESHPANDE 2015, KHAISER 2016	3	0	3	0	0	0	6	98	6	2				6H-2W	PROBABLY BENEFICIAL	NO EFFECT
18	NEUROPATHIC PAIN	NEUROPATHIC PAIN GENERAL	NABILONE	DIHYDROCODEINE	1	LYNCH 2011, PETZKE 2016	1	1	0	0	0	0		96	8	10				6W-5M	NO EFFECT	NO EFFECT
19	NEUROPATHIC PAIN	NEUROPATHIC POSTRAUMATIC PAIN	SMOKED CANNABIS	PLACEBO	1	DESHPANDE 2015	1	0	1	0	0	0	2	21	6					2W	UNCLEAR
20	NEUROPATHIC PAIN	NEUROPATHIC POSTRAUMATIC PAIN	LOWER DOSES CANNABIS	HIGHER DOSES CANNABIS	1	KHAISER 2016	1	0	1	0	0	0	2	21	2					2W	UNCLEAR
21	NEUROPATHIC PAIN	NEUROPATHIC POSTRAUMATIC PAIN	DRONABINOL	DIPHENHYDRAMINE MAX 75MG/D	1	METHA 2015	1	0	1	0	0	0		7	6					28D	NO EFFECT
22	NEUROPATHIC PAIN	DIABETIC NEUROPATHY	NABILONE	PLACEBO	1	LYNCH 2015	1	1	0	0	0	0		26	8					9W	PROBABLY BENEFICIAL
23	NEUROPATHIC PAIN	DIABETIC NEUROPATHY	OROMUCOSAL CANNABIS SPRAY	PLACEBO	1	SNEDECOR	1	1	0	0	0	0	2	30	5					12W	UNCLEAR
24	NEUROPATHIC PAIN	DIABETIC NEUROPATHY	HIGHER VAPORIZED THC	LOWER VAPORIZED THC	1	KHAISER 2016	1	0	1	0	0	0	2	16	2					3H	PROBABLY BENEFICIAL
25	NEUROPATHIC PAIN	NEUROPATHIC PAIN ASSOCIATED WITH ALLODYNIA	OROMUCOSAL CANNABIS SPRAY	PLACEBO	1	LYNCH 2015	1	1	0	0	0	0	2	246	8					14W	PROBABLY BENEFICIAL
26	ACUTE PAIN	ACUTE PAIN	CANNABINOIDS	PLACEBO	1	STEVENS 2017	5	5	0	0	0	0		405	6					6-48H	UNCLEAR
27	ACUTE PAIN	ACUTE POSTOPERATIVE PAIN	LEVONANTRADOL IM	PLACEBO	2	CAMPELL 2001, STEVENS 2017	2	2	0	0	0	0		81	6	6				24H	PROBABLY BENEFICIAL	UNCLEAR
28	ACUTE PAIN	ACUTE PAIN	DRONABINOL	PLACEBO	1	KHAISER 2016	1	0	1	0	0	0		30	2						PROBABLY BENEFICIAL
29	ACUTE PAIN	ACUTE PAIN	SMOKED CANNABIS	PLACEBO	1	KHAISER 2016	2	0	1	0	0	0	3	49	2					1H	UNCLEAR
30	ACUTE PAIN	ACUTE PAIN	SMOKED CANNABIS	DRONABINOL	1	KHAISER 2016	1	0	1	0	0	0	2	30	2						UNCLEAR
31	HEADACHE	MIGRANIE	CANNABIS	NO MEDICAL CANNABIS	4	KHAISER 2016	0	0	0	0	0	1		121	2					NA	PROBABLY BENEFICIAL
32	HEADACHE	MEDICATION OVERUSE HEADACHE	NABILONE	PLACEBO	1	LYNCH 2015	1	0	1	0	0	0		30	8					8W	PROBABLY BENEFICIAL
33	OTHER NEUROLOGICAL DISORDERS	SPASTIC PAIN RELATED TO SCI	ORAL THC	CODEINE	2	METHA 2015; TEASELL 2010	1	1	0	0	1	0	3	22	6	4				6W	UNCLEAR	UNCLEAR
34	CANCER	CANCER-ASSOCIATED ANOREXIA	CANNABINOIDS	PLACEBO	1	MÜCKE 2016	3	3	0	0	0	0		758	9					18D-2M	NO EFFECT
35	CANCER	CANCER-ASSOCIATED ANOREXIA	DRONABINOL	MEGESTROL	1	MÜCKE 2016	1	1	0	0	0	0		469	9					2M	PROBABLY HARMFUL
36	CANCER	REFRACTORY CANCER-PAIN	OROMUCOSAL CANNABIS SPRAY	PLACEBO	1	MÜCKE 2016	2	2	0	0	0	0	4	537	9					2-5W	PROBABLY BENEFICIAL
37	CANCER	CANCER- PAIN	BENZOPYRANOPERIDINE ORAL	PLACEBO	1	CAMPELL 2001	1	0	1	0	0	0		37	6						NO EFFECT
38	CANCER	CANCER- PAIN	BENZOPYRANOPERIDINE ORAL	CODEINE	1	CAMPELL 2001	1	0	1	0	0	0		37	6						NO EFFECT
39	CANCER	CANCER- PAIN	ORAL THC	PLACEBO	1	CAMPELL 2001	2	0	2	0	0	0	4	46	6					1D	PROBABLY BENEFICIAL
40	CANCER	CANCER- PAIN	ORAL THC	CODEINE	1	CAMPELL 2001	1	0	1	0	0	0	2	36	6					1D	NO EFFECT
41	CANCER	CANCER- PAIN	SYNTHETIC NITROGEN ANALOGUE OF THC ORAL	PLACEBO	1	CAMPELL 2001	2	0	2	0	0	0		45	6					6H	PROBABLY HARMFUL
42	CANCER	CANCER- PAIN	SYNTHETIC NITROGEN ANALOGUE OF THC ORAL	CODEINE	1	CAMPELL 2001	1	0	1	0	0	0		30	6					6H	PROBABLY HARMFUL
43	CANCER	CANCER- PAIN	SYNTHETIC NITROGEN ANALOGUE OF THC ORAL	SECOBARBITAL	1	CAMPELL 2001	1	0	1	0	0	0		15	6					6H	PROBABLY HARMFUL
44	CANCER	CHEMOTHERAPY INDUCED NEUROPATHIC PAIN	OROMUCOSAL CANNABIS SPRAY	PLACEBO	2	LYNCH 2015; PETZKE 2016	1	0	1	0	0	0	2	18	8	10				4W	UNCLEAR	NO EFFECT
45	CANCER	CHEMOTHERAPY-INDUCED EMESIS	CANNABINOIDS	PLACEBO	4	OMS, 2016, SMITH 2015, TRAMER 2001, WITHING 2015	13	5	8	0	0	0		309	7	10	4	8		UNCLEAR 4D- 6W	PROBABLY BENEFICIAL	PROBABLY BENEFICIAL	PROBABLY BENEFICIAL	PROBABLY BENEFICIAL
46	CANCER	CHEMOTHERAPY-INDUCED EMESIS	CANNABINOIDS	CONVENTIONAL ANTIEMETICS	5	MACHADO 2008, OMS, 2016, PHILLIPS 2016, SMITH 2015, TRAMER 2001, ven den elsen	31	7	22	0	0	0		1728	7	7	10	10	4	1D-2CX UNCLEAR	PROBABLY BENEFICIAL	UNCLEAR	PROBABLY BENEFICIAL	NO EFFECT	UNCLEAR
47	CANCER	CHEMOTHERAPY-INDUCED EMESIS	CANNABINOIDS + ANTIEMETICS	ANTIEMETIC ALONE	1	SMITH 2015	2	1	1	2	0	0		78	10					UNCLEAR 6D	NO EFFECT
48	CANCER	CHEMOTHERAPY-INDUCED EMESIS	DRONABINOL	PLACEBO	1	MACHADO 2008	3	1	2	0	0	0		183	7					UNCLEAR 4D- 1CX	UNCLEAR
49	CANCER	CHEMOTHERAPY-INDUCED EMESIS	DRONABINOL	NEUROLEPTICS	2	MACHADO 2008, VAN DEN ELSEN 2014	4	2	2	0	0	0		270	7	4				1-4D	PROBABLY BENEFICIAL	NO EFFECT
50	CANCER	CHEMOTHERAPY-INDUCED EMESIS	NABILONE	NEUROLEPTICS	1	MACHADO 2008	7	0	7	0	0	0		183	7					UNCLEAR 4D- 2CX	UNCLEAR
51	CANCER	CHEMOTHERAPY-INDUCED EMESIS	LEVONANTRADOL IM	NEUROLEPTICS	1	MACHADO 2008	2	1	1	0	0	0		128	7					1D-1CX	UNCLEAR
52	OTHER MEDICAL CONDITIONS	REUMATOID ARTRITIS	OROMUCOSAL CANNABIS SPRAY	PLACEBO	3	FITZCHARLES 2016B, FITZCHARLES 2016s, RICHARDS 2012	1	1	0	0	0	0	2	48	9	8	9			5W	UNCLEAR	PROBABLY BENEFICIAL	PROBABLY HARMFUL
53	OTHER MEDICAL CONDITIONS	FIBROMYALGIA	NABILONE	AMITRIPTYLINE	4	DE SOUZA, FITZCHARLES 2016B, FITZCHARLES 2016s, lynch 2015	1	0	1	0	0	0		32	4	9	8	8		2W	PROBABLY BENEFICIAL	NO EFFECT	NO EFFECT	PROBABLY BENEFICIAL
54	OTHER MEDICAL CONDITIONS	FIBROMYALGIA	NABILONE	PLACEBO	4	DE SOUZA, FITZCHARLES 2016B, FITZCHARLES 2016s, LYNCH 2011	1	1	0	0	0	0		40	4	9	8	8		4W	PROBABLY BENEFICIAL	UNCLEAR	PROBABLY BENEFICIAL	PROBABLY BENEFICIAL
55	OTHER MEDICAL CONDITIONS	CROHN’S DISEASE	SMOKED CANNABIS	PLACEBO	2	VOLZ 2016, LANGORSTH	1	1	0	0	0	0	2	21	6	6				8W	PROBABLY BENEFICIAL	PROBABLY BENEFICIAL
56	OTHER MEDICAL CONDITIONS	SPINAL CHRONIC PAIN	NABILONE	PLACEBO	1	FITZCHARLES 2016B	1	0	1	0	0	0		30	9					4W	UNCLEAR
57	OTHER MEDICAL CONDITIONS	OSTEOARTHRITIS	FAAH INHIBITOR	PLACEBO	1	FITZCHARLES 2016S, LYNCH 2015	1	0	1	0	0	0		25	8	8				2W	NO EFFECT	NO EFFECT
58	MULTIPLE SCLEROSIS	MULTIPLE SCLEROSIS GENERAL	CANNABIS AND CANNABINOIDS	PLACEBO	1	OMS 2016	15	10	5	0	0	0		2467	7					3D-48W	PROBABLY BENEFICIAL
59	MULTIPLE SCLEROSIS	MULTIPLE SCLEROSIS PAIN	CANNABINOIDS	PLACEBO	1	ISKEDIJAN 2006	5	4	1	0	0	0		414	5					2-6W	UNCLEAR
60	MULTIPLE SCLEROSIS	MULTIPLE SCLEROSIS PAIN	DRONABINOL	PLACEBO	2	JAWAHAR 2013, KOPPEL 2014, ISKEDIJAN 2006	2	1	1	0	0	0		681	6	3	5			21D-15W	PROBABLY BENEFICIAL	PROBABLY BENEFICIAL	PROBABLY BENEFICIAL
61	MULTIPLE SCLEROSIS	MULTIPLE SCLEROSIS PAIN	OROMUCOSAL CANNABIS SPRAY	PLACEBO	2	KOPPEL 2014, LYNCH 2015	3	3	0	0	2	0	8	899	3	8				6-82W	PROBABLY BENEFICIAL	UNCLEAR
62	MULTIPLE SCLEROSIS	MULTIPLE SCLEROSIS PAIN	ORAL CANNABIS EXTRACT CAPSULES	PLACEBO	1	KOPPEL 2014	3	3	0	0	0	0	6	993	3					15W	BENEFICIAL
63	MULTIPLE SCLEROSIS	MULTIPLE SCLEROSIS PAIN	SMOKED CANNABIS	PLACEBO	2	DESPHANDE 2015, KOPPEL 2014	2	0	2	0	0	0	4	57	6	3				2-3D	UNCLEAR	UNCLEAR
64	MULTIPLE SCLEROSIS	MULTIPLE SCLEROSIS PAIN	NABILONE + GABAPENTINA	GABAPENTINA	1	LYNCH 2015	1	1	0	0	0	0		15	8					9W	PROBABLY BENEFICIAL
65	MULTIPLE SCLEROSIS	MULTIPLE-SCLEROSIS SPASTICITY	CANNABINOIDS	PLACEBO	3	SHAKESPEARE 2003, WHITING 2015, LAKHAN 2009	12	8	4	0	0	0		2162	8	8	4			3D-15W	UNCLEAR	PROBABLY BENEFICIAL	PROBABLY BENEFICIAL
66	MULTIPLE SCLEROSIS	MULTIPLE-SCLEROSIS SPASTICITY	SMOKED CANNABIS	PLACEBO	3	KHAISER 2016, KOPPEL 2014, LYNCH 2015	2	0	2	0	0	0	4	57	2	3	8			2-3D	PROBABLY BENEFICIAL	UNCLEAR	PROBABLY BENEFICIAL
67	MULTIPLE SCLEROSIS	MULTIPLE-SCLEROSIS SPASTICITY	ORAL CANNABIS EXTRACT THC/CBD	PLACEBO	3	KOPPEL 2014, LYNCH 2015, OTERO-ROMERO 2016	5	3	2	0	0	0	10	1022	3	8	2			5D-15W	PROBABLY BENEFICIAL	PROBABLY BENEFICIAL	UNCLEAR
68	MULTIPLE SCLEROSIS	MULTIPLE-SCLEROSIS SPASTICITY	OROMUCOSAL CANNABIS SPRAY THC/CBD	PLACEBO	2	KOOPEL 2014, OTERO-ROMERO 2016	5	5	0	0	1	0	11	983	3	2				4-15W	PROBABLY BENEFICIAL	PROBABLY BENEFICIAL
69	MULTIPLE SCLEROSIS	MULTIPLE-SCLEROSIS SPASTICITY	THC-CBD	THC	1	LAKHAN 2009	3	1	2	0	0	0		697	4					2-15W	UNCLEAR
70	MULTIPLE SCLEROSIS	MULTIPLE SCLEROSIS TREMOR	ORAL CANNABIS EXTRACT THC/CBD	PLACEBO	1	KOPPEL 2014	3	3	0	0	0	0	6	993	3					2-15W	NO EFFECT
71	MULTIPLE SCLEROSIS	MULTIPLE SCLEROSIS TREMOR	OROMUCOSAL CANNABIS SPRAY THC/CBD	PLACEBO	1	KOPPEL 2014	2	2	0	0	0	0	4	526	3					6-15W	NO EFFECT
72	MULTIPLE SCLEROSIS	MULTIPLE SCLEROSIS BLADDER DYSFUNCTION	CANNABIS	PLACEBO	1	ABO 2017	2	2	1	1	0	0		213	7					2-8W	PROBABLY BENEFICIAL
73	MULTIPLE SCLEROSIS	MULTIPLE SCLEROSIS BLADDER DYSFUNCTION	OROMUCOSAL CANNABIS SPRAY THC/CBD	PLACEBO	1	KOPPEL 2014	2	2	0	0	0	0	4	295	3					6-8W	PROBABLY BENEFICIAL
74	MULTIPLE SCLEROSIS	MULTIPLE SCLEROSIS BLADDER DYSFUNCTION	ORAL CANNABIS EXTRACT THC/CBD	PLACEBO	1	KOPPEL 2014	5	4	1	0	0	0	10	1529	3					2-15W	NO EFFECT
75	MULTIPLE SCLEROSIS	MULTIPLE SCLEROSIS BLADDER DYSFUNCTION	ORAL CANNABIS EXTRACT THC	PLACEBO	1	KOPPEL 2014	2	2	0	0	0	0	4	1179	3					13-15W	NO EFFECT
76	MOVEMENT DISORDERS	GILLES DE LA TOURETTE	ORAL THC	PLACEBO	4	CURTIS 2009, KOPPEL 2014, WHITING 2015, OMS 2016	2	1	1	0	0	0	4	36	5	3	8	7		6W	UNCLEAR	UNCLEAR	PROBABLY BENEFICIAL	UNCLEAR
77	MOVEMENT DISORDERS	PARKINSON DISEASE	CANNABIS AND CANNABINOIDS	PLACEBO	1	BEGA 2014	2	0	2	0	0	1		48	1					4H-2M	UNCLEAR
78	MOVEMENT DISORDERS	LEVODOPA-INDUCED DYSKINESIAS IN PARKINSON DISEASE	ORAL CANNABIS EXTRACT THC/CBD	PLACEBO	2	KOPPEL 2014, VAN DEN ELSEN 2014	1	0	1	0	0	0	2	19	3	4				4W	NO EFFECT	NO EFFECT
79	MOVEMENT DISORDERS	CRAMPS IN AMYOTROPHIC LATERAL SCLEROSIS	DRONABINOL	PLACEBO	1	BALDINGER 2012	1	0	1	0	0	0		22	9					2W	UNCLEAR
80	MOVEMENT DISORDERS	HUNTINGTON DISEASE	NABILONE	PLACEBO	1	KOPPEL 2014	1	0	1	0	0	0		15	3					5W	UNCLEAR
81	MOVEMENT DISORDERS	HUNTINGTON DISEASE	CANNABIDIOL ORAL	PLACEBO	1	KOPPEL 2014	1	0	1	0	0	0	2	44	3					6W	UNCLEAR
82	MOVEMENT DISORDERS	CERVICAL DYSTONIA	DRONABINOL	PLACEBO	1	KOPPEL 2014	1	0	1	0	0	0		9	3					3W	UNCLEAR
83	OTHER NEUROLOGICAL DISORDERS	EPILEPSY	CANNABIDIOL ORAL	PLACEBO	2	GLOSS 2014, KOPPEL 2014	3	3	1	1	0	0	8	48	8	3				1-6M	UNCLEAR	UNCLEAR
84	OTHER NEUROLOGICAL DISORDERS	ALZHEIMER'S DISEASE	DRONABINOL	PLACEBO	3	KRISHNAN 2009, VAN DEN ELSEN 2014, MÜCKE 2016	2	0	2	0	0	0		17	8	4	9			2-6W	UNCLEAR	PROBABLY BENEFICIAL	PROBABLY BENEFICIAL
85	PSYCHIATRIC CONDITION	DEPRESSION	OROMUCOSAL CANNABIS SPRAY THC/CBD	PLACEBO	1	WHITING 2015	3	3	0	0	0	0	6	586	8					4-6W	NO EFFECT
86	PSYCSHIATRIC CONDITION	ANXIETY DISORDERS	CANNABIDIOL ORAL	PLACEBO	1	WHITING 2015	1	1	0	0	0	0	2	24	8					90MIN	UNCLEAR
87	PSYCSHIATRIC CONDITION	SLEEP DISORDERS (NO OTHER INDICATIONS)	DRONABINOL	PLACEBO	1	WHITING 2015	1	1	0	0	0	0		22	8					21D	PROBABLY BENEFICIAL
88	PSYCSHIATRIC CONDITION	PSYCHOSIS	CANNABIDIOL ORAL	NO MEDICAL CANNABIS	1	WHITING 2015	2	1	1	0	0	0	4	91	8					4W	NO EFFECT
89	OTHER NEUROLOGICAL DISORDERS	ACUTE PHASE OF ACQUIRED BRAIN INJURY	DRONABINOL	PLACEBO	1	MEYER 2010	2	1	0	0	0	0		928	4					6M	NO EFFECT
90	OTHER MEDICAL CONDITIONS	GLAUCOMA	OROMUCOSAL CANNABIS SPRAY THC/CBD	PLACEBO	1	WHITING 2015	1	0	1	0	0	0	2	6	8					4W	UNCLEAR
91	OTHER MEDICAL CONDITIONS	BREATHLESSNESS	OROMUCOSAL CANNABIS SPRAY THC/CBD	PLACEBO	1	VAN DEN ELSEN 2014	1	0	1	0	0	0	2	11	4					4H	NO EFFECT
92	OTHER MEDICAL CONDITIONS	HIV-NEUROPATHIC PAIN	SMOKED CANNABIS	PLACEBO	3	KHAISER 2016, PILLIPS 2010, LYNCH 2011	2	1	1	0	0	0	4	89	2	7	8			1-2W	PROBABLY BENEFICIAL	UNCLEAR	PROBABLY BENEFICIAL
93	OTHER MEDICAL CONDITIONS	HIV/AIDS	CANNABIS AND CANNABINOIDS	PLACEBO	3	LUTGE 2013, WITHING 2015, OMS 2016	8	4	4	0	0	0		384	9	8	7			7H-12W	UNCLEAR	PROBABLY BENEFICIAL	UNCLEAR
94	OTHER MEDICAL CONDITIONS	HIV WASTING SYNDROME	DRONABINOL	PLACEBO	2	LUTGE 2013, MÜCKE 2016	5	2	3	0	0	0		258	9	9				7H-6W	UNCLEAR	PROBABLY BENEFICIAL
95	OTHER MEDICAL CONDITIONS	HIV WASTING SYNDROME	DRONABINOL	MEGESTROL	1	MÜCKE 2016	1	1	0	0	0	0		37	9					12W	NO EFFECT
96	OTHER MEDICAL CONDITIONS	HIV WASTING SYNDROME	HERBAL	SYNTHETIC	1	MÜCKE 2016	1	1	0	0	0	0	2	67	9					21D	UNCLEAR
